# Supplementary material for: Effect of Neoadjuvant Chemotherapy on Tumor Infiltrating Lymphocytes in Resectable Gastric Cancer: Analysis from a Western Academic Center
Source: Preprints.org preprint supplement (doi:10.20944/preprints202402.1521.v1), 2024-02-27
Supplement: Supplementary file 1 [file supplementary]

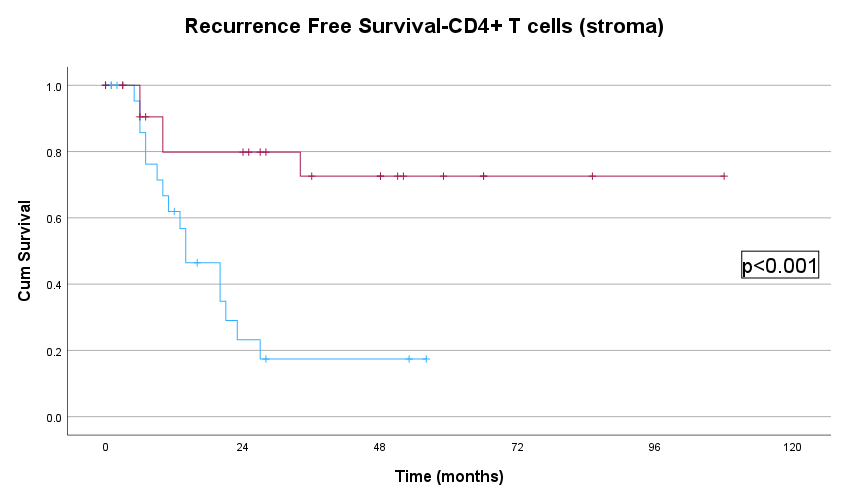


(b)

Low CD4+ conv T cells (n=24)

High CD4+ conv T cells (n=26)


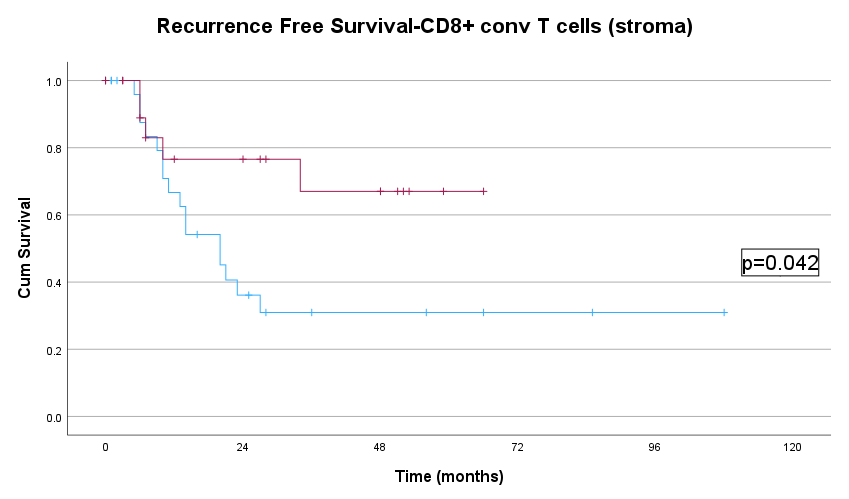


(a)

Low CD8+ conv T cells (n=27)

High CD8+ conv T cells (n=23)


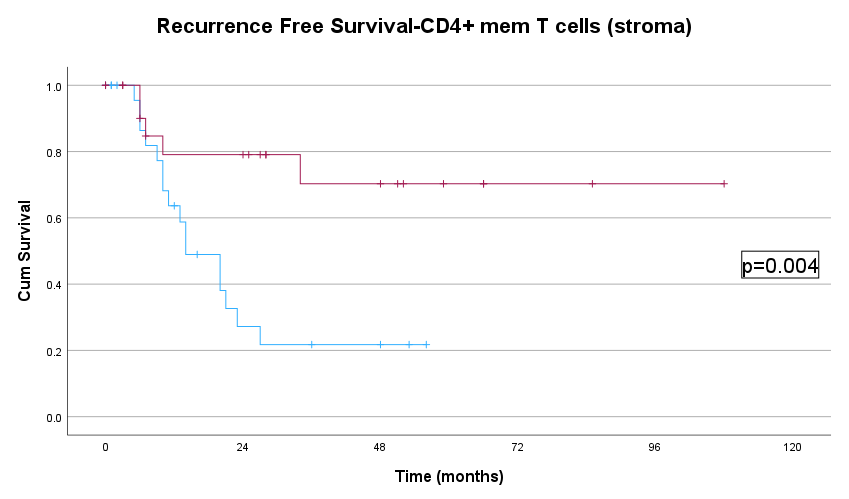


(c)

Low CD4+ T mem cells (n=26)

High CD4+ mem T cells (n=24)


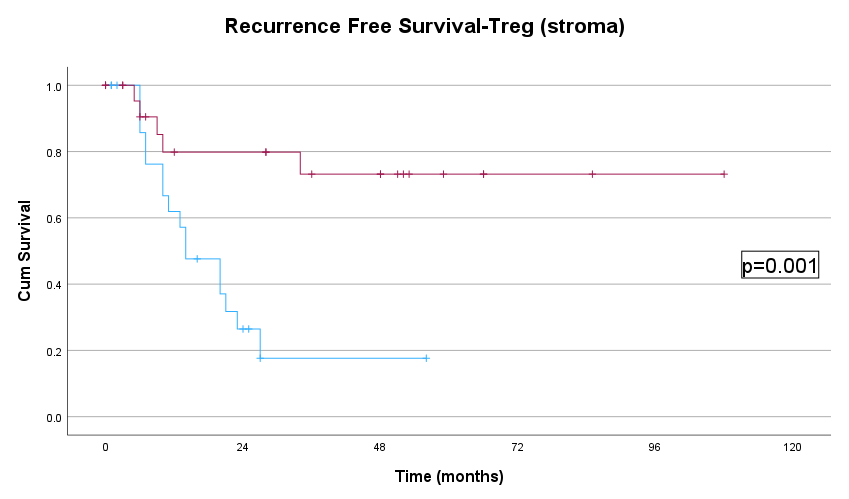


(d)

Low Treg cells (n=24)

High Treg cells (n=26)


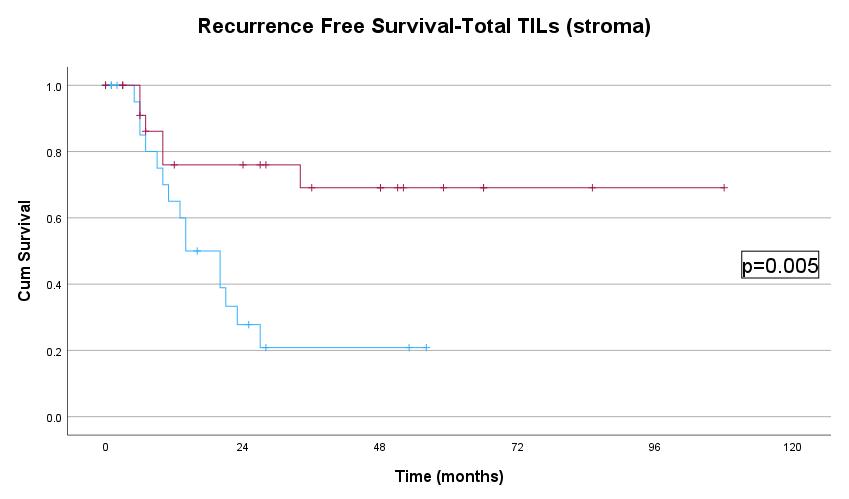


(e)

Low Total TILs (n=24)

High Total TILs (n=26)

**Supplemental Figure 2a-e.** Kaplan-Meier survival curves with log-rank analyses demonstrating improved recurrence free survival in all patients who received NAC with high compared to low **stromal** TILs. Median survival follows in parentheses. (a) low (20.0 mos) versus high (NR, not reached) CD8+ conventional T cells; p=0.042 (b) low (14.0 mos) versus high (NR) CD4+ T cells; p<0.001 (c) low (14.0 mos) versus high (NR) CD4+ memory T cells; p=0.004 (d) low (14.0 mos) versus high (NR) Tregulatory cells; p=0.001 (e) low (14.0 mos) versus high (NR) total TILs.
